# Supplementary material
Source: PubMed Central journal article supplement (PMC2717879)

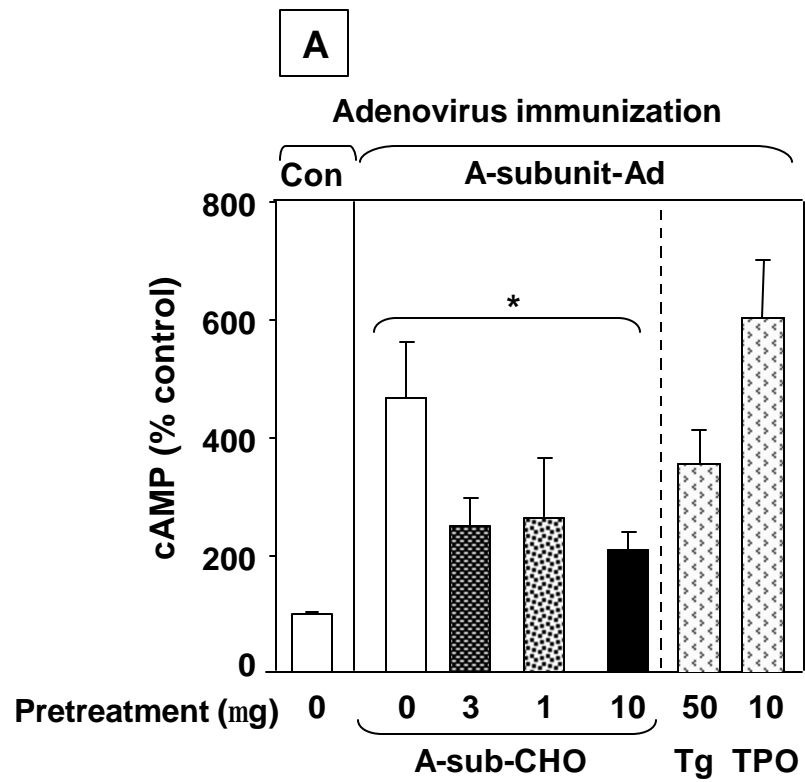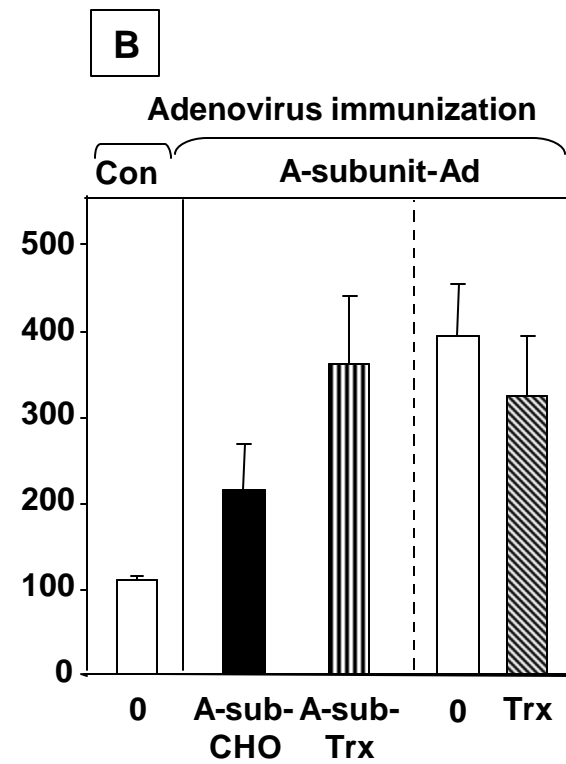

Supplemental Fig. S1

Supplement: en.2009-0181_1.pdf [file en.2009-0181_1.pdf]

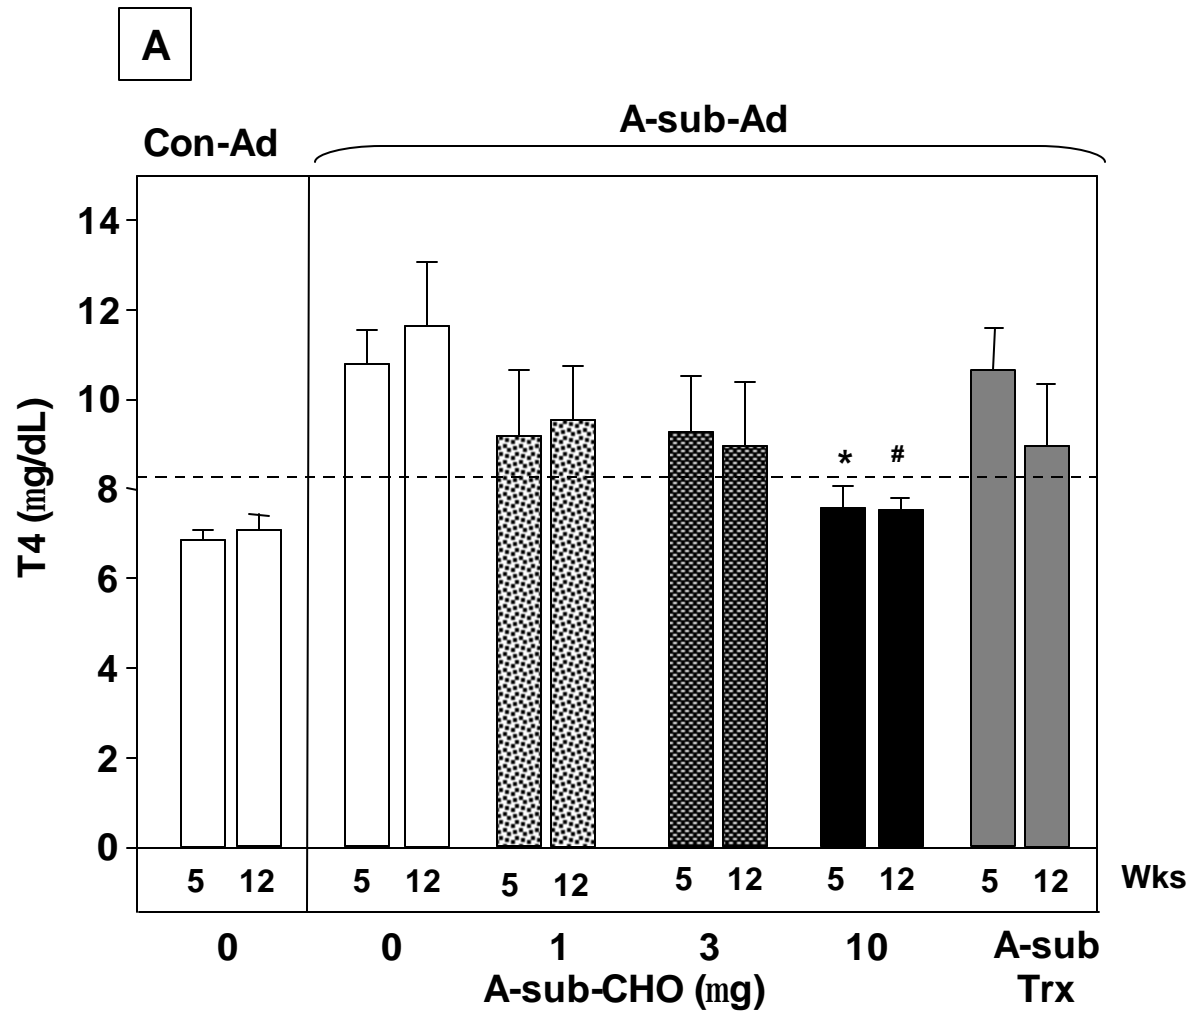

Supplemental Fig. S2A

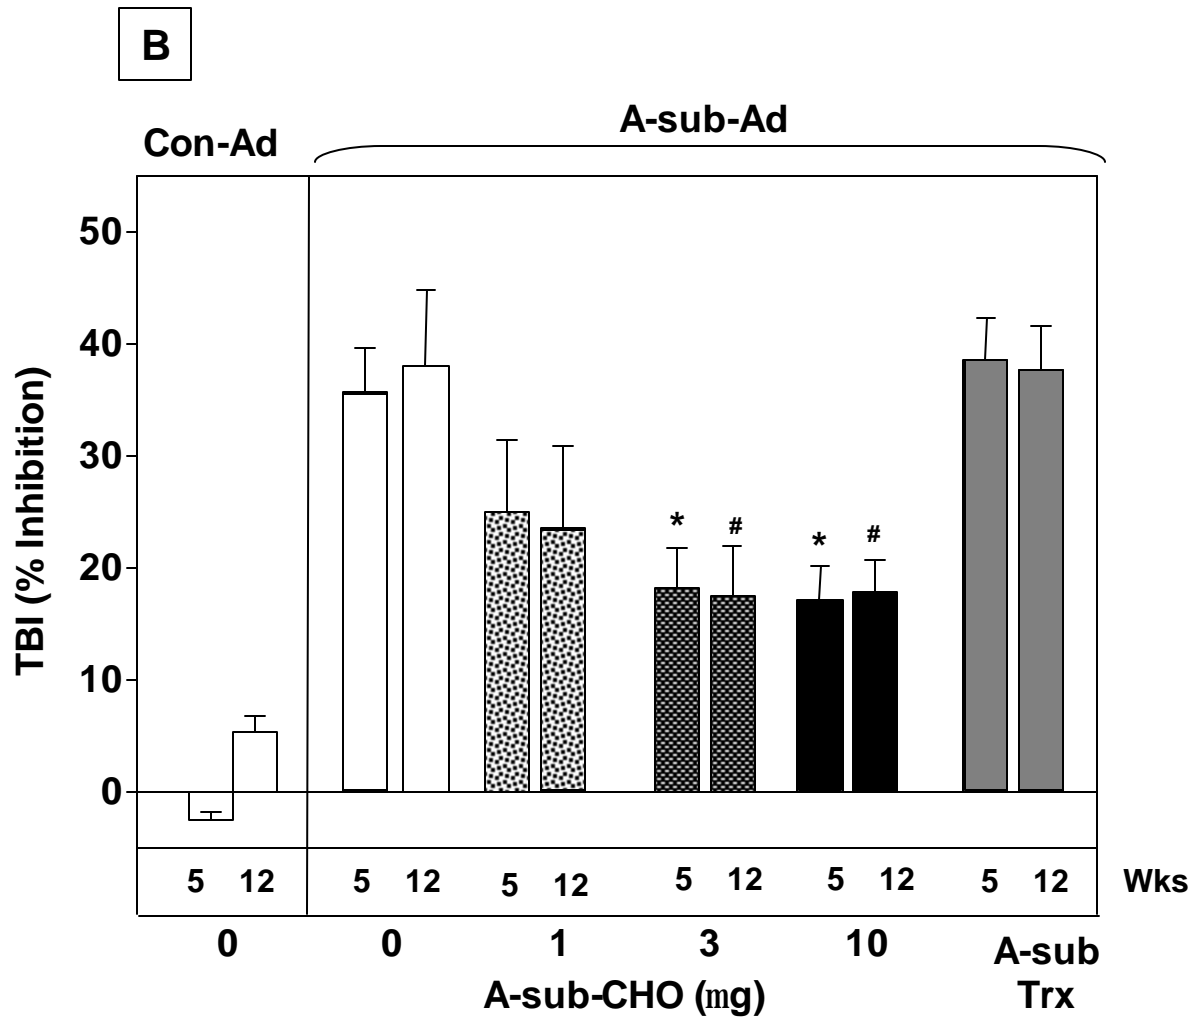

**Supplemental Fig. S2B**

**C**

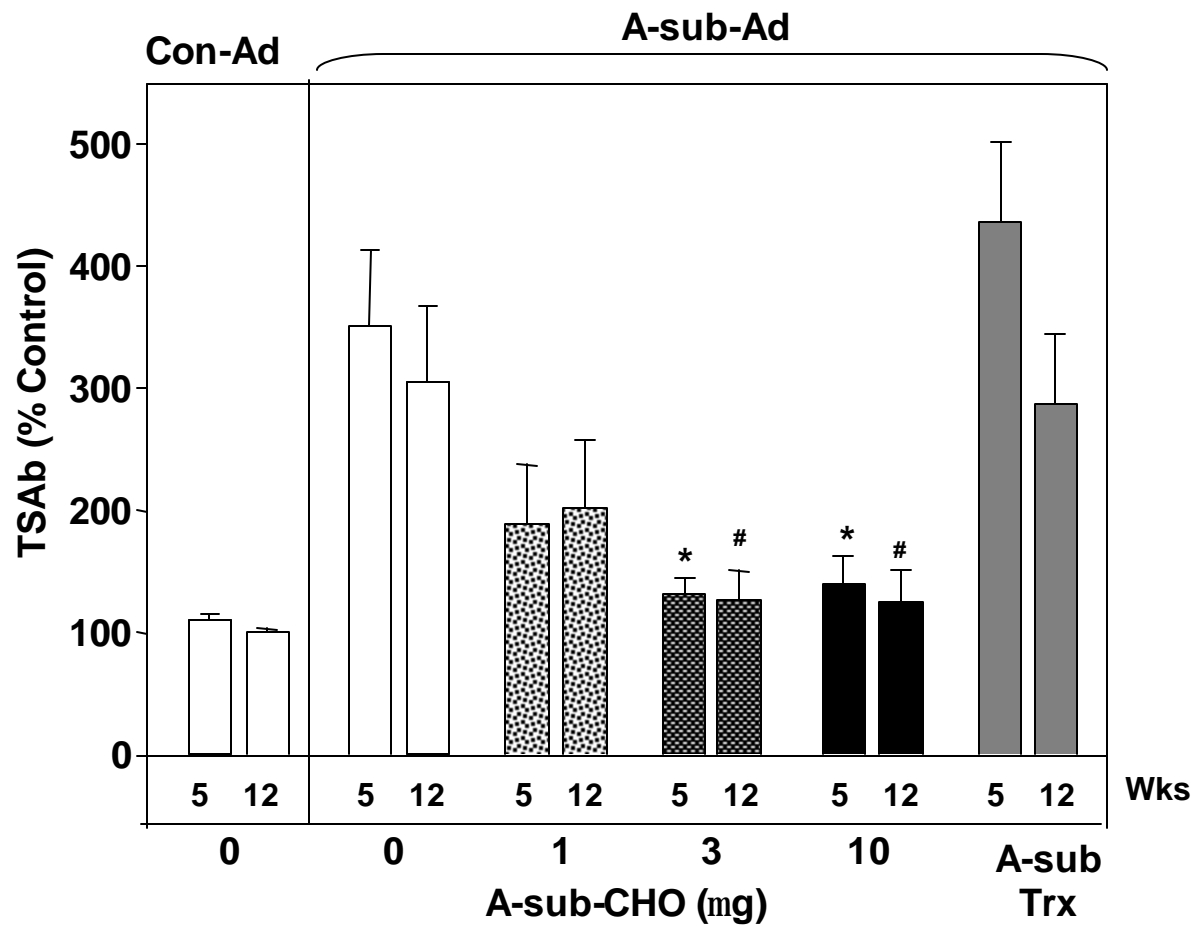

Supplemental Fig. S2C

Supplement: en.2009-0181_2.pdf [file en.2009-0181_2.pdf]
